# Supplementary material for: Acute and Chronic Effects of Green Oat (Avena sativa) Extract on Cognitive Function and Mood during a Laboratory Stressor in Healthy Adults: A Randomised, Double-Blind, Placebo-Controlled Study in Healthy Humans
Source: PubMed Central journal article supplement (PMC7352613; doi:10.3390/nu12061598), 2020-05-29
Supplement: nutrients-12-01598-s001.pdf [file nutrients-12-01598-s001.pdf]

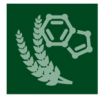

**ONLINE SUPPLEMENTARY MATERIALS**

**Section I**

**Observed Multi-tasking Stressor (OMS)**

'Interview' style laboratory stressors, such as the classic Trier Social Stress Test [1], rely on an element of surprise (prior to free speech and mental arithmetic) and are not typically repeated over time. Computerised multi-tasking stressors, in which participants perform multiple on-screen tasks at once, engender very mild stress responses, but these responses can be sustained across multiple applications (e.g. [2-5]). The OMS combines elements of both of these laboratory stressors, and comprises an extended period of multi-tasking (verbal Serial Subtractions plus a concomitant computerised tracking task) whilst being observed by a panel of three researchers and video recorded in a mock interview situation. The effects of the stressor on psychological state (State-Trait Anxiety Inventory and Bond-Lader Mood Scales – measured immediately before and after the stressor) on both days of the study (Day 1/Day 29) and the three assessments per day (pre-dose, 2 hr post-dose, 4 hr post-dose) are shown in Figures S1, S2, S3, S4 below. Given that there were no treatment related effects on these outcomes, the analysis reported below was by three-way [day (Day1/Day29) x 'assessment' (pre-dose/ 2hr/4hr post-dose) x 'pre/post OMS'] repeated measures ANOVA (GLM - IBM SPSS version 22.0, IBM corp.).

The results show that undergoing the Observed Multi-tasking Stressor had the expected effects on the psychological state of the participants. With reference to a three-way ANOVA of data from before and after the OMS during the three assessments on each of the two visits, completion of the OMS lead to a consistent increase in anxiety (STAI), and decrease in ratings of calmness and contentedness (Bond-Lader) . In the case of the latter two measures this effect had attenuated to a certain extent by the last assessment on Visit 2. Alertness (Bond-Lader) was also reduced by performing the OMS. However, reference to the full data shows that this effect was only apparent during the first two assessments of each visit, possibly due to its superimposition on the natural decrease in alertness seen during the testing visits. Data from the STAI and Bond-Lader Mood Scales is presented below, along with the statistics from the ANOVAs.

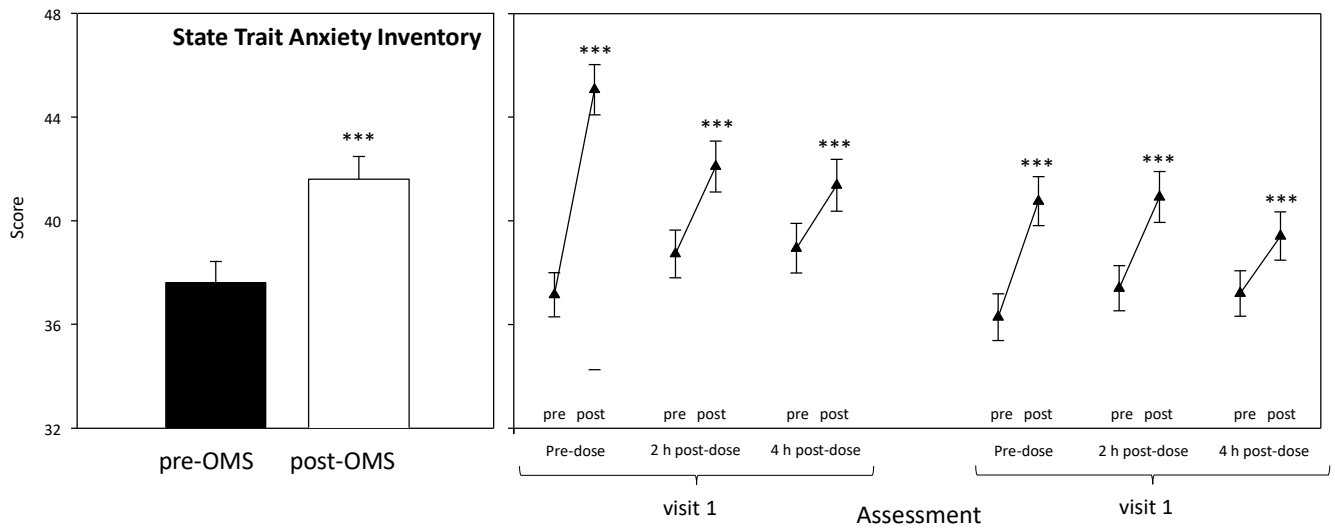

**Figure 1.** The effects of completing the OMS stressor on anxiety. Left panel: the main effect of OMS completion averaged across all assessments [ $F(1, 250) = 161.8, p < 0.001$ ]. Right panel: the pre/post  $\times$  assessment  $\times$  visit interaction [ $F(2, 250) = 11.4, p < 0.001$ ], showing ratings of anxiety before and after the OMS during each assessment on both visits. Asterisks denote a significant difference between pre-OMS and post-OMS ratings during that assessment. \*\*\*,  $p < 0.001$ .

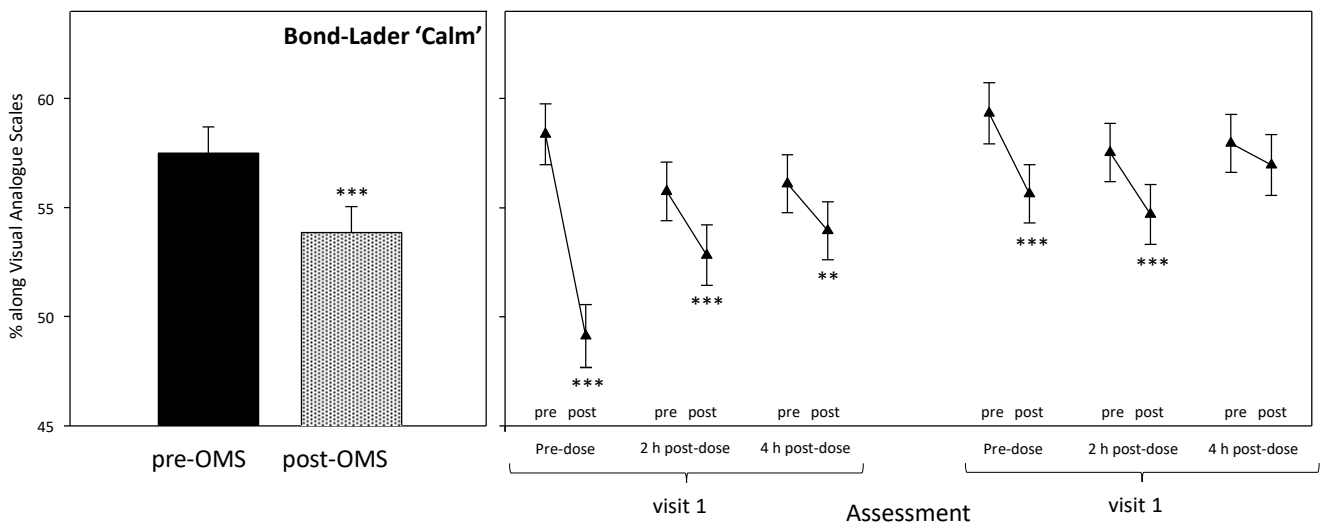

**Figure 2.** The effects of completing the OMS stressor on ratings of calmness (Bond-Lader Mood Scales). Left panel: the main effect of OMS completion averaged across all assessments [ $F(1, 246) = 57.4, p < 0.001$ ]. Right panel: the pre/post  $\times$  assessment  $\times$  visit interaction [ $F(2, 246) = 7.8, p < 0.001$ ], showing ratings of calmness before and after the OMS during each assessment on both visits. Asterisks denote a significant difference between pre-OMS and post-OMS ratings during that assessment. \*\*,  $p < 0.01$ ; \*\*\*,  $p < 0.001$ .

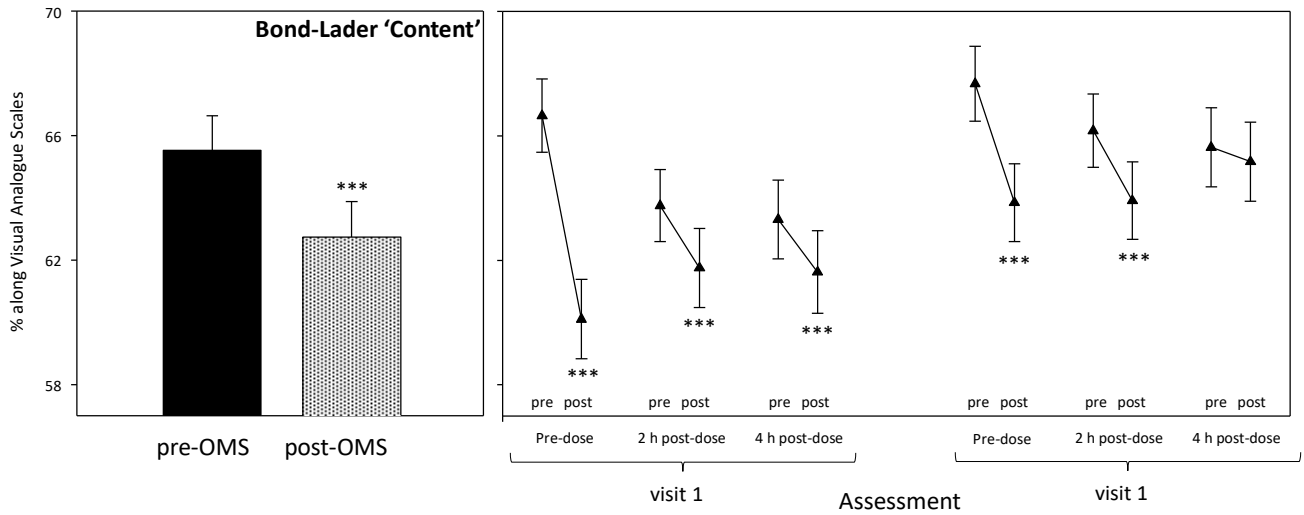

**Figure 3.** The effects of completing the OMS stressor on ratings of contentedness (Bond-Lader Mood Scales). Left panel: the main effect of OMS completion averaged across all assessments [ $F(1, 246) = 67.3$ ,  $p < 0.001$ ]. Right panel: the pre/post x assessment x visit interaction [ $F(2, 246) = 4.6$ ,  $p = 0.012$ ], showing ratings of calmness before and after the OMS during each assessment on both visits. Asterisks denote a significant difference between pre-OMS and post-OMS ratings during that assessment. \*\*,  $p < 0.01$ ; \*\*\*,  $p < 0.001$ .

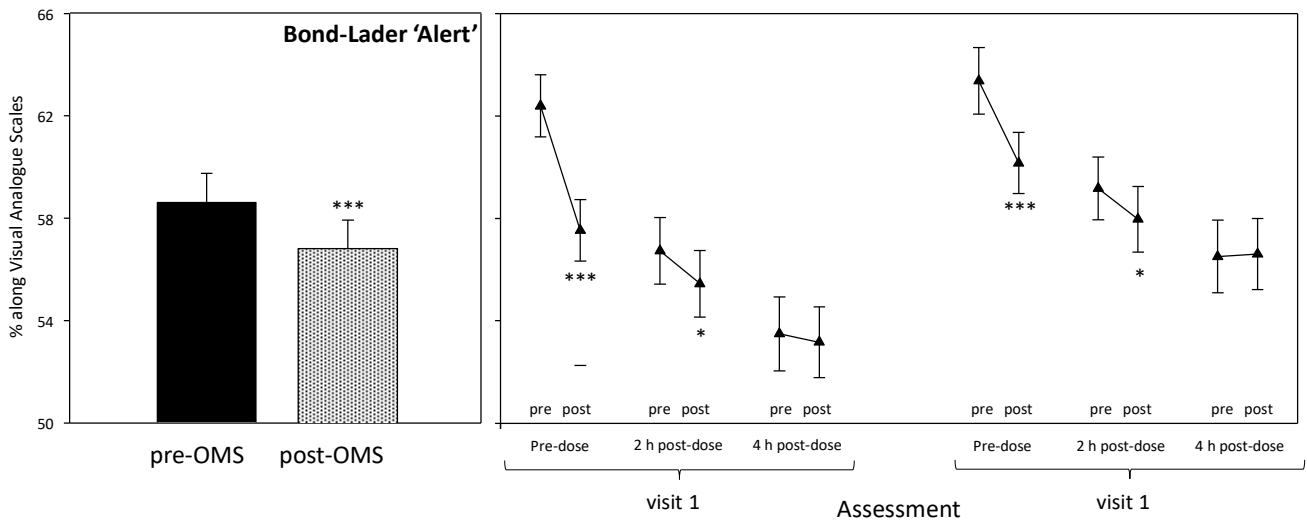

**Figure 4.** The effects of completing the OMS stressor on ratings of alertness (Bond-Lader Mood Scales). Left panel: the main effect of OMS completion averaged across all assessments [ $F(1, 246) = 30.84$ ,  $p < 0.001$ ]. Right panel: ratings of alertness before and after the OMS during each assessment on both visits. In this instance the interaction was between pre/post and assessment [ $F(2, 246) = 23.03$ ,  $p < 0.001$ ] with no visit interaction. Asterisks denote a significant difference between pre-OMS and post-OMS ratings during that assessment. \*,  $p < 0.05$ ; \*\*\*,  $p < 0.001$ .

## Section II – Tables.

|                                                                                                                                  |    |
|----------------------------------------------------------------------------------------------------------------------------------|----|
| Table S1. Acute (Day 1) effects of green oat extract on Cognitive task performance.....                                          | 5  |
| Table S2. Chronic (Day 29) effects of green oat extract on Cognitive task performance.....                                       | 6  |
| Table S3. Acute (Day 1) effects of green oat extract on Multitasking accuracy (subtractions and tracking).....                   | 7  |
| Table S4. Acute (Day 1) effects of green oat extract on Multitasking speed (number of subtractions) and accuracy (tracking)..... | 8  |
| Table S5. Chronic (Day 29) effects of green oat extract on Multitasking accuracy (subtractions and tracking).....                | 9  |
| Table S6. Chronic (Day 29) effects of green oat extract on Multitasking speed (subtractions) and accuracy (tracking).....        | 10 |
| Table S7. Acute (Day 1) effects of green oat extract on the change in mood during the OMS.....                                   | 11 |
| Table S8. Chronic (Day 29) effects of green oat extract on the change in mood during the OMS.....                                | 13 |
| Table S9. Profile of Mood States (POMS) sub-factor scores.....                                                                   | 14 |
| Table S10. General Health Questionnaire-12 (GHQ-12) scores (PP population).....                                                  | 16 |
| Table S11. Acute (Day 1) effects of green oat extract on galvanic skin response and heart data during the stressor .....         | 16 |
| Table S12. Chronic (Day 29) effects of green oat extract on galvanic skin response and heart data.....                           | 17 |
| Table S13. Acute (Day 1) effects of green oat extract on salivary cortisol and $\alpha$ -amylase .....                           | 18 |
| Table S14. Chronic (Day 29) effects of green oat extract on salivary cortisol and $\alpha$ -amylase .....                        | 19 |

**Table 1.** Acute (Day 1) effects of green oat extract on Cognitive task performance. Assessments comprised Corsi Blocks working memory task, Stroop task, Rapid Visual Information Processing task, and Numeric Working Memory task. Pre-dose baseline data are means (+sem); post-dose data (averaged and by assessment) are estimated means (+sem) from the ANCOVA analysis using the pre-dose baseline score and participant’s age as covariates. F statistics (F) and probabilities (P) are from the ANCOVAs. treat = main effect of treatment; treat\*Ass = treatment assessment interaction.

| Day 1<br>Outcome                                     |         | Baseline<br>(Day 1 pre-dose) |      | Post-Dose Averaged |      | Day 1 Post-Dose Assessment |      |       |      | F           | P    |       |
|------------------------------------------------------|---------|------------------------------|------|--------------------|------|----------------------------|------|-------|------|-------------|------|-------|
|                                                      |         | mean                         | sem  | mean               | sem  | 2 hr                       |      | 4 hr  |      |             |      |       |
| Corsi Blocks Working memory (span)<br>N = 132        | Placebo | 5.79                         | 0.14 | 5.81               | 0.10 | 5.86                       | 0.12 | 5.77  | 0.13 | treat       | 3.66 | 0.014 |
|                                                      | 430 mg  | 5.98                         | 0.14 | 5.99               | 0.10 | 5.99                       | 0.12 | 5.98  | 0.13 | treat x ass | 0.20 | 0.898 |
|                                                      | 860 mg  | 6.00                         | 0.14 | 5.65               | 0.10 | 5.66                       | 0.12 | 5.64  | 0.13 |             |      |       |
|                                                      | 1290 mg | 5.73                         | 0.15 | 6.10               | 0.11 | 6.07                       | 0.13 | 6.14  | 0.13 |             |      |       |
| Stroop Task (% acc)<br>N = 132                       | Placebo | 98.92                        | 0.33 | 97.98              | 0.29 | 97.83                      | 0.35 | 98.13 | 0.35 | treat       | 0.77 | 0.516 |
|                                                      | 430 mg  | 98.43                        | 0.33 | 98.23              | 0.29 | 97.94                      | 0.34 | 98.53 | 0.35 | treat x ass | 0.86 | 0.464 |
|                                                      | 860 mg  | 98.33                        | 0.34 | 98.13              | 0.29 | 98.18                      | 0.35 | 98.08 | 0.35 |             |      |       |
|                                                      | 1290 mg | 98.55                        | 0.35 | 98.59              | 0.30 | 98.68                      | 0.36 | 98.5  | 0.36 |             |      |       |
| Stroop Task (msec)<br>N= 132                         | Placebo | 823.7                        | 25.5 | 775.4              | 11.5 | 770.8                      | 11.7 | 779.9 | 14.1 | treat       | 0.61 | 0.607 |
|                                                      | 430 mg  | 825.5                        | 25.5 | 786.6              | 11.4 | 779.8                      | 11.6 | 793.5 | 14.0 | treat x ass | 1.58 | 0.196 |
|                                                      | 860 mg  | 829.5                        | 25.9 | 795.3              | 11.6 | 802.6                      | 11.8 | 788.1 | 14.2 |             |      |       |
|                                                      | 1290 mg | 809.0                        | 26.7 | 777.6              | 12.0 | 784.6                      | 12.2 | 770.6 | 14.7 |             |      |       |
| Rapid Visual Information Processing (% acc)<br>N=129 | Placebo | 57.35                        | 3.54 | 62.90              | 1.68 | 63.53                      | 1.95 | 62.27 | 1.80 | treat       | 1.48 | 0.223 |
|                                                      | 430 mg  | 61.02                        | 3.60 | 63.08              | 1.69 | 63.25                      | 1.97 | 62.91 | 1.81 | treat x ass | 1.91 | 0.132 |
|                                                      | 860 mg  | 60.38                        | 3.54 | 59.28              | 1.67 | 60.85                      | 1.94 | 57.70 | 1.79 |             |      |       |
|                                                      | 1290 mg | 62.82                        | 3.66 | 63.86              | 1.73 | 62.63                      | 2.00 | 65.09 | 1.85 |             |      |       |
| Rapid Visual Information Processing (msec)<br>N=129  | Placebo | 490.3                        | 9.10 | 493.0              | 4.53 | 491.3                      | 6.14 | 494.7 | 5.32 | treat       | 1.58 | 0.197 |
|                                                      | 430 mg  | 497.6                        | 9.24 | 493.2              | 4.58 | 486.1                      | 6.22 | 500.2 | 5.38 | treat x ass | 0.55 | 0.65  |
|                                                      | 860 mg  | 493.3                        | 9.10 | 505.2              | 4.51 | 502.9                      | 6.12 | 507.4 | 5.30 |             |      |       |
|                                                      | 1290 mg | 490.0                        | 9.39 | 497.5              | 4.65 | 496.1                      | 6.31 | 499.0 | 5.54 |             |      |       |
| Numeric Working Memory (% acc)<br>N=132              | Placebo | 95.69                        | 0.70 | 96.86              | 0.55 | 96.72                      | 0.58 | 97.00 | 0.69 | treat       | 0.50 | 0.684 |
|                                                      | 430 mg  | 96.64                        | 0.70 | 96.41              | 0.54 | 96.56                      | 0.57 | 96.25 | 0.68 | treat x ass | 2.19 | 0.092 |
|                                                      | 860 mg  | 95.42                        | 0.71 | 96.63              | 0.55 | 97.60                      | 0.58 | 95.66 | 0.70 |             |      |       |
|                                                      | 1290 mg | 97.53                        | 0.73 | 95.92              | 0.57 | 96.02                      | 0.60 | 95.82 | 0.72 |             |      |       |
| Numeric Working Memory (msec)<br>N=132               | Placebo | 925.1                        | 43.1 | 916.5              | 17.7 | 926.5                      | 20.2 | 906.5 | 19.0 | treat       | 0.93 | 0.43  |
|                                                      | 430 mg  | 917.4                        | 43.1 | 888.0              | 17.6 | 883.4                      | 20.1 | 892.5 | 18.9 | treat x ass | 1.65 | 0.182 |
|                                                      | 860 mg  | 956.1                        | 43.7 | 885.8              | 17.9 | 893.7                      | 20.4 | 877.9 | 19.2 |             |      |       |
|                                                      | 1290 mg | 927.9                        | 45.1 | 917.0              | 18.4 | 939.4                      | 21.1 | 894.6 | 19.8 |             |      |       |

**Table 2.** Chronic (Day 29) effects of green oat extract on Cognitive task performance in the PP population. Assessments comprised: Corsi Blocks working memory task, Stroop task, Rapid Visual Information Processing task, and Numeric Working Memory task. Pre-dose Visit 1 baseline data are means (+sem); post-dose Visit 2 data (averaged and by assessment) are estimated means (+sem) from the ANCOVA analysis using the pre-dose baseline score and participant's age as covariates. F statistics (F) and probabilities (P) are from the ANCOVA. treat = main effect of treatment; treat\*Ass = treatment assessment interaction.

| Day 29<br>Outcome                                           |         | Baseline<br>(Day 1 pre-dose) |      | Post-dose<br>Averaged |      | Day 29 Assessment |      |       |      |       |      | Fs          | p    |       |
|-------------------------------------------------------------|---------|------------------------------|------|-----------------------|------|-------------------|------|-------|------|-------|------|-------------|------|-------|
|                                                             |         | mean                         | sem  | mean                  | sem  | Pre-dose          |      | 2 hr  |      | 4 hr  |      |             |      |       |
|                                                             |         |                              |      |                       |      | mean              | sem  | mean  | sem  | mean  | sem  |             |      |       |
| <b>Corsi Blocks Working memory</b><br>(span)<br>N=128       | Placebo | 5.83                         | 0.14 | 5.75                  | 0.09 | 5.58              | 0.12 | 5.80  | 0.13 | 5.88  | 0.12 | treat       | 2.86 | 0.04  |
|                                                             | 430 mg  | 5.97                         | 0.14 | 6.08                  | 0.09 | 6.09              | 0.12 | 6.05  | 0.12 | 6.09  | 0.12 | treat x ass | 0.97 | 0.448 |
|                                                             | 860 mg  | 6.01                         | 0.14 | 5.87                  | 0.09 | 5.76              | 0.12 | 5.98  | 0.13 | 5.86  | 0.12 |             |      |       |
|                                                             | 1290 mg | 5.83                         | 0.15 | 6.07                  | 0.10 | 5.91              | 0.13 | 6.04  | 0.14 | 6.25  | 0.13 |             |      |       |
| <b>Stroop Task (% acc)</b><br>N=129                         | Placebo | 99.04                        | 0.34 | 98.38                 | 0.23 | 98.30             | 0.31 | 98.05 | 0.36 | 98.79 | 0.31 | treat       | 0.20 | 0.897 |
|                                                             | 430 mg  | 98.38                        | 0.34 | 98.61                 | 0.23 | 98.92             | 0.31 | 98.43 | 0.35 | 98.49 | 0.30 | treat x ass | 0.70 | 0.652 |
|                                                             | 860 mg  | 98.33                        | 0.34 | 98.41                 | 0.23 | 98.39             | 0.31 | 98.39 | 0.36 | 98.45 | 0.31 |             |      |       |
|                                                             | 1290 mg | 98.45                        | 0.37 | 98.48                 | 0.25 | 98.38             | 0.33 | 98.49 | 0.38 | 98.55 | 0.33 |             |      |       |
| <b>Stroop Task (msec)</b><br>N=129                          | Placebo | 824.6                        | 25.9 | 764.6                 | 12.3 | 782.0             | 15.0 | 752.7 | 14.3 | 759.2 | 13.7 | treat       | 0.44 | 0.726 |
|                                                             | 430 mg  | 824.2                        | 25.9 | 777.7                 | 12.2 | 794.9             | 14.9 | 780.4 | 14.2 | 757.8 | 13.7 | treat x ass | 1.43 | 0.203 |
|                                                             | 860 mg  | 827.7                        | 26.3 | 782.7                 | 12.4 | 817.7             | 15.2 | 761.8 | 14.4 | 768.5 | 13.9 |             |      |       |
|                                                             | 1290 mg | 802.6                        | 28.1 | 768.6                 | 13.3 | 796.8             | 16.2 | 764.3 | 15.4 | 744.7 | 14.9 |             |      |       |
| <b>Rapid Visual Information Processing (% acc)</b><br>N=125 | Placebo | 58.36                        | 3.57 | 64.13                 | 1.90 | 64.46             | 2.08 | 62.86 | 2.22 | 65.07 | 2.30 | treat       | 0.53 | 0.662 |
|                                                             | 430 mg  | 61.37                        | 3.63 | 63.64                 | 1.95 | 63.76             | 2.14 | 64.47 | 2.28 | 62.71 | 2.36 | treat x ass | 2.20 | 0.044 |
|                                                             | 860 mg  | 61.02                        | 3.57 | 61.58                 | 1.89 | 65.18             | 2.07 | 62.03 | 2.21 | 57.54 | 2.29 |             |      |       |
|                                                             | 1290 mg | 64.38                        | 3.82 | 64.87                 | 2.03 | 65.93             | 2.22 | 66.06 | 2.36 | 62.61 | 2.45 |             |      |       |
| <b>Rapid Visual Information Processing (msec)</b><br>N=125  | Placebo | 486.6                        | 9.18 | 492.4                 | 4.25 | 485.6             | 4.99 | 492.2 | 5.97 | 499.4 | 5.5  | treat       | 1.41 | 0.244 |
|                                                             | 430 mg  | 498.4                        | 9.33 | 497.3                 | 4.38 | 503.2             | 5.15 | 497.9 | 6.15 | 490.9 | 5.6  | treat x ass | 1.81 | 0.098 |
|                                                             | 860 mg  | 492.3                        | 9.18 | 500.6                 | 4.23 | 497.4             | 4.97 | 497.6 | 5.94 | 506.6 | 5.4  |             |      |       |
|                                                             | 1290 mg | 491.2                        | 9.82 | 488.8                 | 4.52 | 486.7             | 5.31 | 488.1 | 6.35 | 491.7 | 5.8  |             |      |       |
| <b>Numeric Working Memory (% acc)</b><br>N=129              | Placebo | 95.79                        | 0.72 | 96.77                 | 0.69 | 97.03             | 0.76 | 96.33 | 0.79 | 96.96 | 0.90 | treat       | 0.78 | 0.51  |
|                                                             | 430 mg  | 96.53                        | 0.72 | 96.16                 | 0.68 | 96.87             | 0.76 | 96.46 | 0.79 | 95.16 | 0.89 | treat x ass | 0.69 | 0.658 |
|                                                             | 860 mg  | 95.52                        | 0.73 | 96.31                 | 0.70 | 96.96             | 0.77 | 96.33 | 0.80 | 95.63 | 0.91 |             |      |       |
|                                                             | 1290 mg | 97.74                        | 0.78 | 95.23                 | 0.75 | 95.72             | 0.83 | 95.00 | 0.87 | 94.97 | 0.98 |             |      |       |
| <b>Numeric Working Memory (msec)</b><br>N=129               | Placebo | 933.4                        | 43.7 | 903.6                 | 18.5 | 913.9             | 20.1 | 917.6 | 20.9 | 879.5 | 26.1 | treat       | 1.69 | 0.174 |
|                                                             | 430 mg  | 920.5                        | 43.7 | 878.1                 | 18.5 | 886.0             | 20.0 | 872.8 | 20.9 | 875.3 | 26.0 | treat x ass | 1.38 | 0.224 |
|                                                             | 860 mg  | 958.7                        | 44.3 | 895.7                 | 18.8 | 896.4             | 20.3 | 882.9 | 21.2 | 907.7 | 26.4 |             |      |       |
|                                                             | 1290 mg | 923.5                        | 47.4 | 938.2                 | 20.1 | 973.7             | 21.7 | 931.1 | 22.6 | 909.9 | 28.2 |             |      |       |

**Table 3.** Acute (Day 1) effects of green oat extract on Multitasking accuracy (subtractions and tracking). Assessments comprised 12 minutes of Serial Subtractions (3s, 7s, 17s) and the concomitant tracking task. Data for both tasks were converted to standardised Z scores for pooled analysis. Data is presented here averaged across tasks at each assessment (top of table) and averaged across assessments for each task (bottom of table). Pre-dose Visit 1 baseline data are means (+sem); post-dose data are estimated means (+sem) from the LMM analysis using the pre-dose baseline score and participant's age as covariates. F statistics (F) and probabilities (P) are from the LMM analysis. Treat = Main effect of treatment; Treat\*Ass = treatment assessment interaction; Treat\*Outcome = treatment outcome interaction.

| Day 1                                          |               | Baseline<br>(Day 1 pre-dose) |        | Post-dose<br>Averaged              |        | Day 1<br>2 hr |        | Post-dose Assessment<br>4 hr |        | Fs       | p         |               |       |       |
|------------------------------------------------|---------------|------------------------------|--------|------------------------------------|--------|---------------|--------|------------------------------|--------|----------|-----------|---------------|-------|-------|
|                                                |               | mean                         | sem    | mean                               | sem    | mean          | sem    | mean                         | sem    |          |           |               |       |       |
| Subtractions and Tracking Accuracy<br>Z scores | By Assessment | Placebo                      | -0.199 | 0.110                              | -0.253 | 0.106         | -0.215 | 0.112                        | -0.291 | 0.112    | Treat     | 1.53          | 0.209 |       |
|                                                |               | 430 mg                       | -0.166 | 0.110                              | -0.078 | 0.106         | -0.014 | 0.112                        | -0.143 | 0.112    | Treat*Ass | 0.38          | 0.767 |       |
|                                                |               | 860 mg                       | 0.020  | 0.111                              | 0.035  | 0.107         | 0.128  | 0.114                        | -0.058 | 0.114    |           |               |       |       |
|                                                |               | 1290 mg                      | -0.087 | 0.115                              | 0.020  | 0.111         | 0.076  | 0.117                        | -0.036 | 0.117    |           |               |       |       |
|                                                | By Outcome    |                              |        | Baseline<br>(visit 1 assessment 1) |        |               |        | Post-dose Averaged           |        |          |           |               |       |       |
|                                                |               |                              |        | Subtractions                       |        | Tracking      |        | Subtractions                 |        | Tracking |           |               |       |       |
|                                                |               |                              |        | mean                               | sem    | mean          | sem    | mean                         | sem    | mean     | sem       |               |       |       |
|                                                |               | Placebo                      |        | -0.262                             | 0.127  | -0.135        | 0.126  | -0.236                       | 0.112  | -0.270   | 0.112     | Treat*Outcome | 2.64  | 0.048 |
|                                                |               | 430 mg                       |        | -0.160                             | 0.126  | -0.171        | 0.126  | -0.070                       | 0.112  | -0.086   | 0.112     |               |       |       |
|                                                |               | 860 mg                       |        | 0.135                              | 0.128  | -0.096        | 0.128  | 0.078                        | 0.114  | -0.008   | 0.114     |               |       |       |
|                                                |               | 1290 mg                      |        | -0.107                             | 0.132  | -0.067        | 0.132  | -0.076                       | 0.117  | 0.115    | 0.117     |               |       |       |

**Table 4.** Acute (Day 1) effects of green oat extract on Multitasking speed (number of subtractions) and accuracy (tracking). Assessments comprised 12 minutes of Serial Subtractions (3s, 7s, 17s) and the concomitant tracking task. Data for both tasks were converted to standardised Z scores for pooled analysis. Data is presented here averaged across tasks at each assessment (top of table) and averaged across assessments for each task (bottom of table). Pre-dose Visit 1 baseline data are means (+sem); post-dose data are estimated means (+sem) from the LMM analysis using the pre-dose baseline score and participant's age as covariates. F statistics (F) and probabilities (P) are from the LMM analysis. Treat = Main effect of treatment; Treat\*Ass = treatment assessment interaction; Treat\*Outcome = treatment outcome interaction.

| Day 1                                                |               | Baseline<br>(Day 1 pre-dose) |                                    | Post-dose<br>Averaged |          | Day 1 Post-dose Assessment |                    |       |          |       |               |      |       |
|------------------------------------------------------|---------------|------------------------------|------------------------------------|-----------------------|----------|----------------------------|--------------------|-------|----------|-------|---------------|------|-------|
| N = 132                                              |               | mean                         | sem                                | mean                  | sem      | 2 hr                       |                    | 4 hr  |          | Fs    | p             |      |       |
|                                                      |               | mean                         | sem                                | mean                  | sem      | mean                       | sem                | mean  | sem      |       |               |      |       |
| Subtractions Speed and Tracking Accuracy<br>Z scores | Bv Assessment | Place bo                     | -0.223                             | 0.119                 | -0.200   | 0.099                      | -0.147             | 0.104 | -0.253   | 0.104 | Treat         | 1.11 | 0.349 |
|                                                      |               | 430 mg                       | -0.123                             | 0.119                 | 0.018    | 0.099                      | 0.062              | 0.104 | -0.026   | 0.104 | Treat*Ass     | 0.23 | 0.875 |
|                                                      |               | 860 mg                       | -0.155                             | 0.121                 | -0.003   | 0.100                      | 0.027              | 0.105 | -0.034   | 0.105 |               |      |       |
|                                                      |               | 1290 mg                      | -0.162                             | 0.125                 | 0.011    | 0.104                      | 0.029              | 0.109 | -0.007   | 0.109 |               |      |       |
|                                                      |               |                              | Baseline<br>(visit 1 assessment 1) |                       |          |                            | Post-dose Averaged |       |          |       |               |      |       |
|                                                      |               |                              | Subtractions                       |                       | Tracking |                            | Subtractions       |       | Tracking |       |               |      |       |
|                                                      |               |                              | mean                               | sem                   | mean     | sem                        | mean               | sem   | mean     | sem   |               |      |       |
|                                                      | Bv Outcome    | Place bo                     | -0.312                             | 0.130                 | -0.135   | 0.129                      | -0.130             | 0.104 | -0.270   | 0.104 | Treat*Outcome | 8.26 | 0.000 |
|                                                      |               | 430 mg                       | -0.075                             | 0.129                 | -0.171   | 0.129                      | 0.123              | 0.104 | -0.086   | 0.104 |               |      |       |
|                                                      |               | 860 mg                       | -0.214                             | 0.131                 | -0.096   | 0.131                      | 0.002              | 0.105 | -0.008   | 0.105 |               |      |       |
| 1290 mg                                              |               | -0.257                       | 0.135                              | -0.067                | 0.135    | -0.093                     | 0.109              | 0.115 | 0.109    |       |               |      |       |



**Table 5.** Chronic (Day 29) effects of green oat extract on Multitasking accuracy (subtractions and tracking) in the PP population. Assessments comprised 12 minutes of Serial Subtractions (3s, 7s, 17s) and the concomitant tracking task. Data for both tasks were converted to standardised Z scores for pooled analysis. Data is presented here averaged across tasks at each assessment (top of table) and averaged across assessments for each task (bottom of table). Pre-dose Visit 1 baseline data are means (+sem); post-dose Visit 2 data are estimated means (+sem) from the LMM analysis using the pre-dose baseline score and participant's age as covariates. F statistics (F) and probabilities (P) are from the LMM analysis. Treat = Main effect of treatment; Treat\*Ass = treatment assessment interaction; Treat\*Outcome = treatment outcome interaction.

| <b>Day 29</b>                                         |                      | <b>Baseline<br/>(Day 1 pre-dose)</b> |            | <b>Post-dose<br/>Averaged</b>              |            | <b>Day 29 Assessment</b> |            |                           |            |                 |            |           |           |               |       |       |
|-------------------------------------------------------|----------------------|--------------------------------------|------------|--------------------------------------------|------------|--------------------------|------------|---------------------------|------------|-----------------|------------|-----------|-----------|---------------|-------|-------|
| N = 126                                               |                      | <b>mean</b>                          | <b>sem</b> | <b>mean</b>                                | <b>sem</b> | <b>Pre-dose</b>          |            | <b>2 hr</b>               |            | <b>4 hr</b>     |            |           |           |               |       |       |
|                                                       |                      | <b>mean</b>                          | <b>sem</b> | <b>mean</b>                                | <b>sem</b> | <b>mean</b>              | <b>sem</b> | <b>mean</b>               | <b>sem</b> | <b>mean</b>     | <b>sem</b> | <b>Fs</b> | <b>p</b>  |               |       |       |
| <b>Subtractions and Tracking Accuracy</b><br>Z scores | <b>Bv Assessment</b> | Place bo                             | -0.196     | 0.113                                      | -0.085     | 0.101                    | -0.023     | 0.110                     | -0.040     | 0.110           | -0.19      | 0.110     | Treat     | 1.72          | 0.167 |       |
|                                                       |                      | 430 mg                               | -0.189     | 0.113                                      | 0.125      | 0.103                    | 0.184      | 0.111                     | 0.136      | 0.111           | 0.055      | 0.111     | Treat*Ass | 0.27          | 0.952 |       |
|                                                       |                      | 860 mg                               | 0.030      | 0.115                                      | 0.113      | 0.000                    | 0.138      | 0.112                     | 0.175      | 0.112           | 0.027      | 0.112     |           |               |       |       |
|                                                       |                      | 1290 mg                              | -0.095     | 0.123                                      | 0.244      | 0.101                    | 0.259      | 0.120                     | 0.276      | 0.120           | 0.197      | 0.120     |           |               |       |       |
|                                                       | <b>Bv Outcome</b>    |                                      |            | <b>Baseline<br/>(visit 1 assessment 1)</b> |            |                          |            | <b>Post-dose Averaged</b> |            |                 |            |           |           |               |       |       |
|                                                       |                      |                                      |            | <b>Subtractions</b>                        |            | <b>Tracking</b>          |            | <b>Subtractions</b>       |            | <b>Tracking</b> |            |           |           |               |       |       |
|                                                       |                      |                                      |            | <b>mean</b>                                | <b>sem</b> | <b>mean</b>              | <b>sem</b> | <b>mean</b>               | <b>sem</b> | <b>mean</b>     | <b>sem</b> |           |           |               |       |       |
|                                                       |                      | Place bo                             |            | -0.252                                     | 0.131      | -0.141                   | 0.130      | 0.011                     | 0.106      | -0.181          | 0.105      |           |           | Treat*Outcome | 10.48 | 0.000 |
|                                                       |                      | 430 mg                               |            | -0.189                                     | 0.130      | -0.189                   | 0.130      | 0.107                     | 0.106      | 0.143           | 0.106      |           |           |               |       |       |
|                                                       |                      | 860 mg                               |            | 0.154                                      | 0.132      | -0.095                   | 0.132      | 0.178                     | 0.108      | 0.048           | 0.108      |           |           |               |       |       |
| 1290 mg                                               |                      | -0.099                               | 0.141      | -0.092                                     | 0.141      | 0.099                    | 0.115      | 0.389                     | 0.115      |                 |            |           |           |               |       |       |

**Table 6.** Chronic (Day 29) effects of green oat extract on Multitasking speed (subtractions) and accuracy (tracking) in the PP population. Assessments comprised 15 minutes of Serial Subtractions (3s, 7s, 17s) and the concomitant tracking task. Data for both tasks was converted to standardised Z scores for pooled analysis. Data is presented here averaged across tasks at each assessment (top of table) and averaged across assessments for each task (bottom of table). Pre-dose Visit 1 baseline data are means (+sem); post-dose Visit 2 data are estimated means (+sem) from the LMM analysis using the pre-dose baseline score and participant's age as covariates. F statistics (F) and probabilities (P) are from the LMM analysis. Treat = Main effect of treatment; Treat\*Ass = treatment assessment interaction; Treat\*Outcome = treatment outcome interaction.

| Day 29<br>N = 126                                    |               | Baseline<br>(Day 1 pre-dose)       |        | Post-dose<br>Averaged |        | Day 29 Assessment |        |          |        |       |       | Fs    | p             |       |       |
|------------------------------------------------------|---------------|------------------------------------|--------|-----------------------|--------|-------------------|--------|----------|--------|-------|-------|-------|---------------|-------|-------|
|                                                      |               | mean                               | sem    | mean                  | sem    | Pre-dose          |        | 2 hr     |        | 4 hr  |       |       |               |       |       |
|                                                      |               | mean                               | sem    | mean                  | sem    | mean              | sem    | mean     | sem    | mean  | sem   |       |               |       |       |
| Subtractions Speed and Tracking Accuracy<br>Z scores | Bv Assessment | Placebo                            | -0.211 | 0.123                 | -0.096 | 0.103             | -0.052 | 0.110    | -0.047 | 0.110 | -0.18 | 0.110 | Treat         | 1.64  | 0.183 |
|                                                      |               | 430 mg                             | -0.130 | 0.123                 | 0.185  | 0.104             | 0.229  | 0.111    | 0.224  | 0.111 | 0.102 | 0.111 | Treat*Ass     | 0.36  | 0.903 |
|                                                      |               | 860 mg                             | -0.146 | 0.125                 | 0.102  | 0.105             | 0.091  | 0.113    | 0.166  | 0.113 | 0.050 | 0.113 |               |       |       |
|                                                      |               | 1290 mg                            | -0.176 | 0.134                 | 0.192  | 0.113             | 0.193  | 0.120    | 0.226  | 0.120 | 0.158 | 0.120 |               |       |       |
|                                                      | Bv Outcome    | Baseline<br>(visit 1 assessment 1) |        | Post-dose Averaged    |        | Subtractions      |        | Tracking |        |       |       |       |               |       |       |
|                                                      |               |                                    |        |                       |        | Subtractions      |        | Tracking |        |       |       |       |               |       |       |
|                                                      |               |                                    |        | mean                  | sem    | mean              | sem    | mean     | sem    | mean  | sem   |       |               |       |       |
|                                                      |               | Placebo                            | -0.282 | 0.134                 | -0.141 | 0.134             | -0.001 | 0.107    | -0.191 | 0.107 |       |       | Treat*Outcome | 20.41 | 0.000 |
|                                                      |               | 430 mg                             | -0.070 | 0.134                 | -0.189 | 0.134             | 0.226  | 0.107    | 0.143  | 0.107 |       |       |               |       |       |
|                                                      |               | 860 mg                             | -0.198 | 0.136                 | -0.095 | 0.136             | 0.156  | 0.109    | 0.048  | 0.109 |       |       |               |       |       |
| 1290 mg                                              | -0.260        | 0.145                              | -0.092 | 0.145                 | -0.004 | 0.117             | 0.389  | 0.117    |        |       |       |       |               |       |       |

**Table 7.** *Acute (Day 1) effects of green oat extract on the change in mood during the OMS.* Mood was measured before (pre) and after (post) the stressor. Assessments comprised the State-Trait Anxiety Inventory and Bond-Lader Mood Scales. Pre-dose baseline data are means (+sem); post-dose data are estimated means (+sem) from the LMM analysis using the pre-dose baseline score and participant’s age as covariates. F statistics (F) and probabilities (P) are from the LMM analysis. Treat = Main effect of treatment; Treat x Ass = treatment assessment interaction.

| Day 1                                    |                             |         | Baseline<br>(Day 1 pre-dose) |       | Post-dose Averaged |       | 2 hr  |       | Day 1 Post-dose Assessment<br>4 hr |       |             |             |       |       |
|------------------------------------------|-----------------------------|---------|------------------------------|-------|--------------------|-------|-------|-------|------------------------------------|-------|-------------|-------------|-------|-------|
| Outcome                                  |                             |         | mean                         | sem   | mean               | sem   | mean  | sem   | mean                               | sem   | F           | P           |       |       |
| State Trait Anxiety Inventory<br>N = 131 | placebo                     | pre     | 38.56                        | 1.78  | 41.62              | 1.77  | 41.24 | 1.85  | 42.00                              | 1.85  | Treat       | 1.08        | 0.362 |       |
|                                          |                             | post    | 45.94                        | 1.78  | 43.77              | 1.77  | 44.00 | 1.85  | 43.53                              | 1.85  | Treat x ass | 0.31        | 0.82  |       |
|                                          | 430 mg                      | pre     | 36.27                        | 1.80  | 36.94              | 1.80  | 36.36 | 1.87  | 37.52                              | 1.87  |             |             |       |       |
|                                          |                             | post    | 43.48                        | 1.80  | 39.92              | 1.80  | 40.36 | 1.87  | 39.48                              | 1.87  |             |             |       |       |
|                                          | 860 mg                      | pre     | 37.00                        | 1.80  | 38.62              | 1.80  | 38.94 | 1.87  | 38.29                              | 1.87  |             |             |       |       |
|                                          |                             | post    | 45.67                        | 1.80  | 41.65              | 1.80  | 42.03 | 1.87  | 41.27                              | 1.87  |             |             |       |       |
|                                          | 1290 mg                     | pre     | 36.74                        | 1.86  | 38.23              | 1.86  | 38.26 | 1.93  | 38.19                              | 1.93  |             |             |       |       |
|                                          |                             | post    | 43.90                        | 1.86  | 40.76              | 1.86  | 41.08 | 1.93  | 40.45                              | 1.93  |             |             |       |       |
|                                          | Bond-Lader Alert<br>N = 130 | placebo | pre                          | 61.19 | 2.41               | 51.55 | 2.51  | 53.75 | 2.61                               | 49.34 | 2.61        | Treat       | 1.69  | 0.173 |
|                                          |                             |         | post                         | 56.07 | 2.41               | 51.61 | 2.51  | 52.99 | 2.61                               | 50.22 | 2.61        | Treat x ass | 0.80  | 0.496 |
| 430 mg                                   |                             | pre     | 65.05                        | 2.45  | 59.13              | 2.55  | 61.01 | 2.65  | 57.26                              | 2.65  |             |             |       |       |
|                                          |                             | post    | 59.56                        | 2.45  | 58.28              | 2.55  | 58.98 | 2.65  | 57.57                              | 2.65  |             |             |       |       |
| 860 mg                                   |                             | pre     | 60.89                        | 2.45  | 53.60              | 2.55  | 54.15 | 2.65  | 53.05                              | 2.65  |             |             |       |       |
|                                          |                             | post    | 56.02                        | 2.45  | 52.43              | 2.55  | 53.32 | 2.65  | 51.54                              | 2.65  |             |             |       |       |
| 1290 mg                                  |                             | pre     | 63.64                        | 2.56  | 56.62              | 2.68  | 58.13 | 2.78  | 55.10                              | 2.78  |             |             |       |       |
|                                          |                             | post    | 60.51                        | 2.56  | 56.32              | 2.68  | 57.72 | 2.78  | 54.93                              | 2.78  |             |             |       |       |
| Bond-Lader Content<br>N = 130            |                             | placebo | pre                          | 64.85 | 2.44               | 59.91 | 2.39  | 60.62 | 2.48                               | 59.20 | 2.48        | Treat       | 1.08  | 0.362 |
|                                          |                             |         | post                         | 58.31 | 2.44               | 59.13 | 2.39  | 59.35 | 2.48                               | 58.91 | 2.48        | Treat x ass | 1.25  | 0.293 |
|                                          | 430 mg                      | pre     | 68.93                        | 2.47  | 65.88              | 2.43  | 66.72 | 2.51  | 65.04                              | 2.51  |             |             |       |       |
|                                          |                             | post    | 61.60                        | 2.47  | 63.59              | 2.43  | 63.91 | 2.51  | 63.27                              | 2.51  |             |             |       |       |
|                                          | 860 mg                      | pre     | 66.39                        | 2.47  | 63.56              | 2.43  | 63.09 | 2.51  | 64.02                              | 2.51  |             |             |       |       |
|                                          |                             | post    | 59.80                        | 2.47  | 62.03              | 2.43  | 61.38 | 2.51  | 62.68                              | 2.51  |             |             |       |       |
|                                          | 1290 mg                     | pre     | 68.08                        | 2.59  | 65.22              | 2.55  | 65.05 | 2.64  | 65.39                              | 2.64  |             |             |       |       |
|                                          |                             | post    | 64.29                        | 2.59  | 64.33              | 2.55  | 64.92 | 2.64  | 63.75                              | 2.64  |             |             |       |       |
|                                          | Bond-Lader Calm<br>N = 130  | placebo | pre                          | 58.66 | 2.86               | 54.52 | 2.50  | 54.68 | 2.65                               | 54.35 | 2.65        | Treat       | 0.38  | 0.769 |
|                                          |                             |         | post                         | 51.54 | 2.86               | 51.15 | 2.50  | 51.15 | 2.65                               | 51.16 | 2.65        | Treat x ass | 0.88  | 0.45  |

---

|         |      |       |      |       |      |       |      |       |      |
|---------|------|-------|------|-------|------|-------|------|-------|------|
| 430 mg  | pre  | 59.24 | 2.90 | 56.56 | 2.54 | 56.02 | 2.69 | 57.11 | 2.69 |
|         | post | 47.23 | 2.90 | 54.94 | 2.54 | 54.59 | 2.69 | 55.29 | 2.69 |
| 860 mg  | pre  | 57.44 | 2.90 | 56.62 | 2.54 | 56.06 | 2.69 | 57.18 | 2.69 |
|         | post | 49.67 | 2.90 | 55.45 | 2.54 | 53.73 | 2.69 | 57.17 | 2.69 |
| 1290 mg | pre  | 59.55 | 3.04 | 55.26 | 2.66 | 55.33 | 2.82 | 55.18 | 2.82 |
|         | post | 50.73 | 3.04 | 52.84 | 2.66 | 53.05 | 2.82 | 52.63 | 2.82 |

---

**Table 8.** Chronic (Day 29) effects of green oat extract on the change in mood during the OMS (PP population). Mood was measured before (pre) and after (post) the stressor. Assessments comprised the State-Trait Anxiety Inventory and Bond-Lader Mood Scales. Pre-dose baseline data are means (+sem); post-dose data are estimated means (+sem) from the LMM analysis using the pre-dose baseline score and participant's age as covariates. F statistics (F) and probabilities (P) are from the LMM analysis. Treat = Main effect of treatment; Treat x Ass = treatment assessment interaction.

| Day 29                                          |                                    |         | Baseline<br>(Day 1 pre-dose) |       | Post-dose Averaged |       | Day 29 Assessment |       |       |       |       |       | F           | P           |       |       |
|-------------------------------------------------|------------------------------------|---------|------------------------------|-------|--------------------|-------|-------------------|-------|-------|-------|-------|-------|-------------|-------------|-------|-------|
| Outcome                                         |                                    |         | mean                         | sem   | mean               | sem   | Pre-dose          |       | 2 hr  |       | 4 hr  |       |             |             |       |       |
|                                                 |                                    |         |                              |       |                    |       | mean              | sem   | mean  | sem   | mean  | sem   |             |             |       |       |
| <b>State Trait Anxiety Inventory</b><br>N = 125 | placebo                            | pre     | 38.52                        | 1.83  | 39.18              | 1.71  | 39.35             | 1.80  | 39.21 | 1.80  | 38.97 | 1.80  | Treat       | 0.75        | 0.524 |       |
|                                                 |                                    | post    | 46.03                        | 1.83  | 41.72              | 1.71  | 42.27             | 1.80  | 41.58 | 1.80  | 41.30 | 1.80  | Treat x ass | 1.39        | 0.216 |       |
|                                                 | 430 mg                             | pre     | 35.97                        | 1.86  | 36.93              | 1.73  | 35.84             | 1.83  | 37.66 | 1.83  | 37.28 | 1.83  |             |             |       |       |
|                                                 |                                    | post    | 43.30                        | 1.86  | 40.54              | 1.73  | 41.38             | 1.83  | 42.25 | 1.83  | 37.98 | 1.83  |             |             |       |       |
|                                                 | 860 mg                             | pre     | 36.94                        | 1.86  | 35.24              | 1.73  | 34.29             | 1.83  | 35.72 | 1.83  | 35.72 | 1.83  |             |             |       |       |
|                                                 |                                    | post    | 45.50                        | 1.86  | 38.80              | 1.73  | 38.53             | 1.83  | 39.25 | 1.83  | 38.62 | 1.83  |             |             |       |       |
|                                                 | 1290 mg                            | pre     | 36.93                        | 1.99  | 36.04              | 1.85  | 35.39             | 1.96  | 36.25 | 1.96  | 36.46 | 1.96  |             |             |       |       |
|                                                 |                                    | post    | 44.43                        | 1.99  | 39.56              | 1.85  | 39.96             | 1.96  | 40.18 | 1.96  | 38.54 | 1.96  |             |             |       |       |
|                                                 | <b>Bond-Lader Alert</b><br>N = 124 | placebo | pre                          | 61.43 | 2.45               | 56.76 | 2.39              | 60.64 | 2.56  | 57.27 | 2.55  | 52.37 | 2.55        | Treat       | 1.62  | 0.189 |
|                                                 |                                    |         | post                         | 56.03 | 2.45               | 55.21 | 2.39              | 56.85 | 2.56  | 55.64 | 2.55  | 53.14 | 2.55        | Treat x ass | 1.93  | 0.074 |
| 430 mg                                          |                                    | pre     | 66.04                        | 2.49  | 62.56              | 2.42  | 65.79             | 2.59  | 62.33 | 2.59  | 59.56 | 2.59  |             |             |       |       |
|                                                 |                                    | post    | 60.37                        | 2.49  | 61.39              | 2.42  | 61.24             | 2.59  | 61.44 | 2.59  | 61.48 | 2.59  |             |             |       |       |
| 860 mg                                          |                                    | pre     | 61.01                        | 2.49  | 59.00              | 2.42  | 63.55             | 2.59  | 58.64 | 2.59  | 54.81 | 2.59  |             |             |       |       |
|                                                 |                                    | post    | 55.95                        | 2.49  | 57.24              | 2.42  | 60.35             | 2.59  | 56.45 | 2.59  | 54.94 | 2.59  |             |             |       |       |
| 1290 mg                                         |                                    | pre     | 63.53                        | 2.71  | 62.81              | 2.64  | 66.41             | 2.82  | 60.92 | 2.82  | 61.12 | 2.82  |             |             |       |       |
|                                                 |                                    | post    | 60.57                        | 2.71  | 61.85              | 2.64  | 65.03             | 2.82  | 60.84 | 2.82  | 59.66 | 2.82  |             |             |       |       |
| <b>Bond-Lader Content</b><br>N = 124            |                                    | placebo | pre                          | 65.04 | 2.47               | 63.81 | 2.29              | 64.30 | 2.40  | 64.42 | 2.39  | 62.72 | 2.39        | Treat       | 0.87  | 0.461 |
|                                                 |                                    |         | post                         | 58.41 | 2.47               | 61.57 | 2.29              | 60.56 | 2.40  | 61.70 | 2.39  | 62.45 | 2.39        | Treat x ass | 1.04  | 0.396 |
|                                                 | 430 mg                             | pre     | 69.56                        | 2.51  | 68.22              | 2.33  | 69.34             | 2.43  | 68.03 | 2.43  | 67.29 | 2.43  |             |             |       |       |
|                                                 |                                    | post    | 62.28                        | 2.51  | 65.82              | 2.33  | 64.36             | 2.43  | 65.52 | 2.43  | 67.59 | 2.43  |             |             |       |       |
|                                                 | 860 mg                             | pre     | 66.57                        | 2.51  | 67.79              | 2.33  | 69.44             | 2.43  | 67.10 | 2.43  | 66.81 | 2.43  |             |             |       |       |
|                                                 |                                    | post    | 59.64                        | 2.51  | 65.99              | 2.33  | 65.85             | 2.43  | 65.66 | 2.43  | 66.47 | 2.43  |             |             |       |       |
|                                                 | 1290 mg                            | pre     | 67.25                        | 2.73  | 67.67              | 2.53  | 68.93             | 2.64  | 66.92 | 2.64  | 67.17 | 2.64  |             |             |       |       |
|                                                 |                                    | post    | 62.78                        | 2.73  | 66.20              | 2.53  | 66.88             | 2.64  | 64.96 | 2.64  | 66.74 | 2.64  |             |             |       |       |
|                                                 | <b>Bond-Lader Calm</b><br>N = 124  | placebo | pre                          | 58.97 | 2.92               | 56.18 | 2.48              | 56.13 | 2.67  | 56.67 | 2.66  | 55.74 | 2.66        | Treat       | 0.43  | 0.734 |
|                                                 |                                    |         | post                         | 51.67 | 2.92               | 54.02 | 2.48              | 54.91 | 2.67  | 52.65 | 2.66  | 54.49 | 2.66        | Treat x ass | 1.20  | 0.306 |
| 430 mg                                          |                                    | pre     | 59.69                        | 2.97  | 58.10              | 2.52  | 58.59             | 2.71  | 58.08 | 2.71  | 57.64 | 2.71  |             |             |       |       |
|                                                 |                                    | post    | 47.45                        | 2.97  | 56.36              | 2.52  | 53.91             | 2.71  | 56.14 | 2.71  | 59.03 | 2.71  |             |             |       |       |
| 860 mg                                          |                                    | pre     | 57.44                        | 2.97  | 59.92              | 2.52  | 62.34             | 2.71  | 58.30 | 2.71  | 59.13 | 2.71  |             |             |       |       |
|                                                 |                                    | post    | 49.58                        | 2.97  | 56.43              | 2.52  | 56.30             | 2.71  | 55.08 | 2.71  | 57.91 | 2.71  |             |             |       |       |
| 1290 mg                                         |                                    | pre     | 59.91                        | 3.23  | 59.72              | 2.74  | 61.26             | 2.95  | 58.46 | 2.95  | 59.44 | 2.95  |             |             |       |       |
|                                                 |                                    | post    | 50.80                        | 3.23  | 57.96              | 2.74  | 59.13             | 2.95  | 56.39 | 2.95  | 58.37 | 2.95  |             |             |       |       |

**Table 9.** Profile of Mood States (POMS) sub-factor scores (PP population). Data are raw means (+sem) pre and post-dose on the first (Day 1 – i.e. acute) and last (Day 29 – i.e. chronic) day of supplementation. F statistics (F) and probabilities (P) are from a two-factor [treatment x pre/post dose] ANOVA.

| N = 125                       |         | Day 1    |      |           |      | Day 29   |      |           |      | Fs            | p    |       |
|-------------------------------|---------|----------|------|-----------|------|----------|------|-----------|------|---------------|------|-------|
|                               |         | Pre-dose |      | Post-dose |      | Pre-dose |      | Post-dose |      |               |      |       |
| Outcome                       |         | mean     | sem  | mean      | sem  | mean     | sem  | mean      | sem  |               |      |       |
| <b>Tension/Anxiety</b>        | Placebo | 10.24    | 1.09 | 11.15     | 1.20 | 9.58     | 1.07 | 8.36      | 1.06 | Treat*vis     | 0.14 | 0.935 |
|                               | 430 mg  | 7.12     | 1.09 | 8.21      | 1.20 | 6.00     | 1.07 | 6.52      | 1.06 | Treat*vis*ass | 0.79 | 0.501 |
|                               | 860 mg  | 9.13     | 1.13 | 9.23      | 1.24 | 7.52     | 1.10 | 7.65      | 1.09 |               |      |       |
|                               | 1290 mg | 9.07     | 1.19 | 9.89      | 1.30 | 7.54     | 1.16 | 7.32      | 1.15 |               |      |       |
| <b>Friendliness</b>           | Placebo | 15.00    | 0.66 | 14.79     | 0.73 | 15.06    | 0.65 | 15.91     | 0.70 | Treat*vis     | 0.40 | 0.757 |
|                               | 430 mg  | 16.97    | 0.66 | 16.18     | 0.73 | 17.15    | 0.65 | 16.39     | 0.70 | Treat*vis*ass | 1.60 | 0.194 |
|                               | 860 mg  | 15.90    | 0.68 | 16.45     | 0.76 | 16.55    | 0.68 | 16.52     | 0.72 |               |      |       |
|                               | 1290 mg | 16.07    | 0.72 | 14.43     | 0.80 | 16.46    | 0.71 | 15.68     | 0.76 |               |      |       |
| <b>Fatigue/Inertia</b>        | Placebo | 7.82     | 0.95 | 10.24     | 0.99 | 6.55     | 0.80 | 7.06      | 0.93 | Treat*vis     | 0.63 | 0.597 |
|                               | 430 mg  | 5.73     | 0.95 | 6.30      | 0.99 | 4.42     | 0.80 | 5.33      | 0.93 | Treat*vis*ass | 1.63 | 0.186 |
|                               | 860 mg  | 7.10     | 0.98 | 8.65      | 1.03 | 6.16     | 0.82 | 7.29      | 0.96 |               |      |       |
|                               | 1290 mg | 6.36     | 1.03 | 7.61      | 1.08 | 5.07     | 0.86 | 5.68      | 1.01 |               |      |       |
| <b>Depression/Dejection</b>   | Placebo | 4.67     | 1.03 | 6.30      | 1.16 | 4.67     | 1.07 | 4.12      | 1.02 | Treat*vis     | 0.33 | 0.804 |
|                               | 430 mg  | 4.09     | 1.03 | 4.55      | 1.16 | 3.09     | 1.07 | 3.12      | 1.02 | Treat*vis*ass | 1.05 | 0.372 |
|                               | 860 mg  | 4.87     | 1.06 | 5.55      | 1.20 | 3.84     | 1.10 | 3.26      | 1.05 |               |      |       |
|                               | 1290 mg | 5.29     | 1.11 | 5.82      | 1.26 | 4.96     | 1.16 | 5.04      | 1.11 |               |      |       |
| <b>Confusion/Bewilderment</b> | Placebo | 10.18    | 0.92 | 11.06     | 1.12 | 9.91     | 0.99 | 9.88      | 1.02 | Treat*vis     | 2.35 | 0.076 |
|                               | 430 mg  | 8.03     | 0.92 | 9.33      | 1.12 | 7.33     | 0.99 | 8.27      | 1.02 | Treat*vis*ass | 1.15 | 0.330 |
|                               | 860 mg  | 10.00    | 0.95 | 11.97     | 1.15 | 8.48     | 1.02 | 8.16      | 1.05 |               |      |       |
|                               | 1290 mg | 8.21     | 1.00 | 10.21     | 1.21 | 8.07     | 1.08 | 8.50      | 1.11 |               |      |       |
| <b>Anger/Hostility</b>        | Placebo | 3.97     | 0.78 | 4.91      | 0.89 | 4.03     | 0.87 | 4.09      | 0.80 | Treat*vis     | 0.11 | 0.952 |
|                               | 430 mg  | 4.15     | 0.78 | 3.24      | 0.89 | 3.18     | 0.87 | 3.06      | 0.80 | Treat*vis*ass | 1.11 | 0.349 |
|                               | 860 mg  | 4.74     | 0.81 | 4.68      | 0.92 | 4.77     | 0.90 | 4.23      | 0.82 |               |      |       |
|                               | 1290 mg | 4.96     | 0.85 | 4.89      | 0.97 | 4.25     | 0.95 | 4.07      | 0.87 |               |      |       |
| <b>Vigour/Activity</b>        | Placebo | 16.36    | 1.26 | 15.67     | 1.35 | 15.49    | 1.12 | 15.91     | 1.26 | Treat*vis     | 2.31 | 0.080 |
|                               | 430 mg  | 19.06    | 1.26 | 17.85     | 1.35 | 20.39    | 1.12 | 19.03     | 1.26 | Treat*vis*ass | 0.58 | 0.629 |
|                               | 860 mg  | 17.42    | 1.30 | 16.23     | 1.39 | 18.29    | 1.15 | 18.71     | 1.30 |               |      |       |
|                               | 1290 mg | 18.25    | 1.36 | 16.04     | 1.47 | 20.11    | 1.21 | 19.50     | 1.36 |               |      |       |
| <b>Total Mood Disturbance</b> | Placebo | 20.52    | 4.61 | 28.00     | 5.03 | 19.24    | 4.71 | 17.61     | 4.77 | Treat*vis     | 0.26 | 0.856 |

---

|         |       |      |       |      |       |      |       |      |               |      |       |
|---------|-------|------|-------|------|-------|------|-------|------|---------------|------|-------|
| 430 mg  | 10.06 | 4.61 | 13.79 | 5.03 | 3.64  | 4.71 | 7.27  | 4.77 | Treat*vis*ass | 1.38 | 0.252 |
| 860 mg  | 18.42 | 4.75 | 23.84 | 5.19 | 12.48 | 4.86 | 11.88 | 4.92 |               |      |       |
| 1290 mg | 15.64 | 5.00 | 22.39 | 5.46 | 9.79  | 5.12 | 11.11 | 5.18 |               |      |       |

---

**Table 10.** General Health Questionnaire-12 (GHQ-12) scores (PP population). Data are raw means (+sem) pre and post-dose on the first (Day 1 – i.e. acute) and last (Day 29 – i.e. chronic) day of supplementation. F statistics (F) and probabilities (P) are from a two-factor [treatment x pre/post dose] ANOVA.

| Outcome                                      |         | Day 1    |      |           |      | Day 29   |      |           |      | Fs            | p    |       |
|----------------------------------------------|---------|----------|------|-----------|------|----------|------|-----------|------|---------------|------|-------|
|                                              |         | Pre-dose |      | Post-dose |      | Pre-dose |      | Post-dose |      |               |      |       |
|                                              |         | mean     | sem  | mean      | sem  | mean     | sem  | mean      | sem  |               |      |       |
| General Health Questionnaire – 12<br>N = 125 | Placebo | 10.73    | 0.56 | 10.24     | 0.63 | 8.79     | 0.58 | 8.70      | 0.65 | Treat*vis     | 0.02 | 0.997 |
|                                              | 430 mg  | 9.55     | 0.56 | 9.36      | 0.63 | 7.85     | 0.58 | 7.85      | 0.65 | Treat*vis*ass | 0.96 | 0.414 |
|                                              | 860 mg  | 10.19    | 0.57 | 9.91      | 0.64 | 8.50     | 0.59 | 8.50      | 0.66 |               |      |       |
|                                              | 1290 mg | 10.54    | 0.61 | 10.61     | 0.68 | 9.25     | 0.63 | 8.61      | 0.70 |               |      |       |

**Table 11.** Acute (Day 1) effects of green oat extract on galvanic skin response and heart data during the stressor. Pre-dose Day 1 baseline data are means (+sem); post-dose data are estimated means (+sem) from the LMM analysis using the pre-dose Visit 1 baseline score and participant’s age as covariates. F statistics (F) and probabilities (P) are from the LMM analysis. Treat = Main effect of treatment; Treat\*Ass = treatment assessment interaction.

| Outcome                                             |         | Day 1 |      | Baseline (Day 1 pre-dose) |      | Post-dose Averaged |      | Day 1 Post-dose Assessment |      |           |      | Fs    | p |
|-----------------------------------------------------|---------|-------|------|---------------------------|------|--------------------|------|----------------------------|------|-----------|------|-------|---|
|                                                     |         |       |      |                           |      |                    |      | 2 hr                       |      | 4 hr      |      |       |   |
|                                                     |         | mean  | sem  | mean                      | sem  | mean               | sem  | mean                       | sem  | mean      | sem  |       |   |
| Galvanic Skin Response<br>(microsiemens)<br>N = 132 | Placebo | 3.94  | 0.90 | 2.72                      | 0.69 | 3.10               | 0.73 | 2.35                       | 0.73 | Treat     | 1.31 | 0.275 |   |
|                                                     | 430 mg  | 3.62  | 0.90 | 3.19                      | 0.69 | 3.38               | 0.73 | 3.01                       | 0.73 | Treat*Ass | 1.07 | 0.360 |   |
|                                                     | 860 mg  | 4.48  | 0.92 | 2.01                      | 0.70 | 2.47               | 0.74 | 1.54                       | 0.74 |           |      |       |   |
|                                                     | 1290 mg | 2.42  | 0.95 | 1.34                      | 0.73 | 1.28               | 0.76 | 1.41                       | 0.76 |           |      |       |   |
| Heart Rate<br>(Beats per Minute)<br>N = 132         | Placebo | -1.14 | 1.65 | -3.56                     | 1.69 | -3.10              | 1.73 | -4.03                      | 1.72 | Treat     | 1.29 | 0.282 |   |
|                                                     | 430 mg  | 1.14  | 1.65 | -0.41                     | 1.69 | 0.19               | 1.72 | -1.01                      | 1.73 | Treat*Ass | 4.47 | 0.004 |   |
|                                                     | 860 mg  | 0.53  | 1.67 | 1.06                      | 1.72 | 0.94               | 1.75 | 1.18                       | 1.75 |           |      |       |   |
|                                                     | 1290 mg | -0.78 | 1.73 | -1.04                     | 1.77 | -2.07              | 1.81 | -0.01                      | 1.81 |           |      |       |   |



**Table 12.** Chronic (Day 29) effects of green oat extract on galvanic skin response and heart data (PP population). Pre-dose Day 1 baseline data are means (+sem); Day 29 data are estimated means (+sem) from the LMM analysis using the pre-dose Day 1 baseline score and participant’s age as covariates. F statistics (F) and probabilities (P) are from the LMM analysis. Treat = Main effect of treatment; Treat\*Ass = treatment assessment interaction.

| Day 29                                                     |         | Baseline (Day 1 pre-dose) |      | Post-dose Averaged |      | Day 29 Post-dose Assessment |      |       |      |       |      | F         | p    |       |
|------------------------------------------------------------|---------|---------------------------|------|--------------------|------|-----------------------------|------|-------|------|-------|------|-----------|------|-------|
|                                                            |         | mean                      | sem  | mean               | sem  | 1                           |      | 2     |      | 3     |      |           |      |       |
| Outcome                                                    |         | mean                      | sem  | mean               | sem  | mean                        | sem  | mean  | sem  | mean  | sem  |           |      |       |
| <b>Galvanic Skin Response</b><br>(microsiemens)<br>N = 126 | Placebo | 4.03                      | 0.92 | 2.20               | 0.45 | 2.44                        | 0.47 | 2.09  | 0.47 | 2.08  | 0.47 | Treat     | 1.50 | 0.217 |
|                                                            | 430 mg  | 3.43                      | 0.92 | 1.66               | 0.45 | 1.92                        | 0.47 | 1.50  | 0.47 | 1.55  | 0.47 | Treat*Ass | 3.40 | 0.003 |
|                                                            | 860 mg  | 4.57                      | 0.93 | 1.81               | 0.46 | 2.43                        | 0.47 | 1.32  | 0.47 | 1.67  | 0.47 |           |      |       |
|                                                            | 1290 mg | 2.51                      | 1.00 | 0.81               | 0.49 | 1.65                        | 0.51 | 0.36  | 0.51 | 0.42  | 0.51 |           |      |       |
| <b>Heart Rate</b><br>(Beats per Minute)<br>N = 126         | Placebo | -1.22                     | 1.70 | -1.72              | 1.71 | -0.85                       | 1.79 | -1.24 | 1.79 | -3.08 | 1.79 | Treat     | 0.22 | 0.884 |
|                                                            | 430 mg  | 1.10                      | 1.70 | 0.01               | 1.71 | -0.08                       | 1.79 | 0.01  | 1.79 | 0.10  | 1.79 | Treat*Ass | 2.11 | 0.05  |
|                                                            | 860 mg  | 0.47                      | 1.73 | -0.24              | 1.74 | -1.20                       | 1.81 | 0.52  | 1.81 | -0.03 | 1.81 |           |      |       |
|                                                            | 1290 mg | -0.28                     | 1.85 | -0.16              | 1.86 | 0.81                        | 1.94 | -0.87 | 1.94 | -0.42 | 1.94 |           |      |       |

**Table 13.** Acute (Day 1) effects of green oat extract on salivary cortisol and  $\alpha$ -amylase. Pre-dose Day 1 baseline data are means (+sem); post-dose data are estimated means (+sem) from the LMM analysis using the pre-dose Day 1 baseline score and participant’s age as covariates. F statistics (F) and probabilities (P) are from the LMM analysis. Treat = Main effect of treatment; Treat\*Ass = treatment assessment interaction.

| Day 1                        |         | Baseline (Day 1 pre-dose) |       | Post-dose Averaged |       | 2 hr  |       | Day 1 Post-dose Assessment 4 hr |       | F     | P             |       |       |
|------------------------------|---------|---------------------------|-------|--------------------|-------|-------|-------|---------------------------------|-------|-------|---------------|-------|-------|
| Outcome                      |         | mean                      | sem   | mean               | sem   | mean  | sem   | mean                            | sem   |       |               |       |       |
| Cortisol<br>N = 128          | placebo | pre                       | 0.343 | 0.041              | 0.169 | 0.023 | 0.146 | 0.028                           | 0.191 | 0.028 | Treat         | 0.891 | 0.448 |
|                              |         | post                      | 0.341 | 0.041              | 0.203 | 0.024 | 0.167 | 0.028                           | 0.24  | 0.028 | Treat*prepost | 0.18  | 0.91  |
|                              | 430 mg  | pre                       | 0.281 | 0.041              | 0.145 | 0.023 | 0.137 | 0.028                           | 0.152 | 0.028 | Treat*pp*ass  | 0.465 | 0.707 |
|                              |         | post                      | 0.297 | 0.041              | 0.178 | 0.023 | 0.166 | 0.028                           | 0.19  | 0.028 |               |       |       |
|                              | 860 mg  | pre                       | 0.251 | 0.042              | 0.198 | 0.024 | 0.18  | 0.029                           | 0.216 | 0.029 |               |       |       |
|                              |         | post                      | 0.274 | 0.042              | 0.212 | 0.024 | 0.216 | 0.029                           | 0.209 | 0.029 |               |       |       |
|                              | 1290 mg | pre                       | 0.25  | 0.043              | 0.153 | 0.024 | 0.131 | 0.029                           | 0.175 | 0.029 |               |       |       |
|                              |         | post                      | 0.311 | 0.043              | 0.178 | 0.024 | 0.161 | 0.029                           | 0.195 | 0.029 |               |       |       |
| $\alpha$ -amylase<br>N = 127 | placebo | pre                       | 182.3 | 25.7               | 217.5 | 23.1  | 188.5 | 25.8                            | 246.5 | 25.7  | Treat         | 0.436 | 0.727 |
|                              |         | post                      | 221.1 | 26.4               | 197.7 | 23.5  | 169.5 | 26.2                            | 226.0 | 26.2  | Treat*prepost | 1.19  | 0.313 |
|                              | 430 mg  | pre                       | 176.3 | 26.1               | 195.0 | 23.4  | 200.0 | 25.9                            | 190.1 | 26.1  | Treat*pp*ass  | 1.005 | 0.391 |
|                              |         | post                      | 215.8 | 26.1               | 214.1 | 23.5  | 196.5 | 25.9                            | 231.7 | 26.3  |               |       |       |
|                              | 860 mg  | pre                       | 178.3 | 26.5               | 186.0 | 23.9  | 181.3 | 26.6                            | 190.8 | 26.5  |               |       |       |
|                              |         | post                      | 181.7 | 26.7               | 172.6 | 24.1  | 150.8 | 26.8                            | 194.4 | 26.8  |               |       |       |
|                              | 1290 mg | pre                       | 175.5 | 26.9               | 219.6 | 24.1  | 226.0 | 26.7                            | 213.3 | 26.7  |               |       |       |
|                              |         | post                      | 209.0 | 26.9               | 205.6 | 24.2  | 224.9 | 26.7                            | 186.2 | 26.9  |               |       |       |

**Table 14.** Chronic (Day 29) effects of green oat extract on salivary cortisol and  $\alpha$ -amylase (PP population). Pre-dose Day 1 baseline data are means (+sem); Day 29 data are estimated means (+sem) from the LMM analysis using the pre-dose Day 1 baseline score and participant’s age as covariates. F statistics (F) and probabilities (P) are from the LMM analysis. Treat = Main effect of treatment; Treat\*Ass = treatment assessment interaction.

| Day 29 Outcome             |                                               |         | Baseline (Day 1 pre-dose) |       | Post-dose Averaged |       | Day 29 Post-dose Assessment |       |       |       |       |       | F             | P             |       |       |
|----------------------------|-----------------------------------------------|---------|---------------------------|-------|--------------------|-------|-----------------------------|-------|-------|-------|-------|-------|---------------|---------------|-------|-------|
|                            |                                               |         | mean                      | sem   | mean               | sem   | 1                           |       | 2     |       | 3     |       |               |               |       |       |
|                            |                                               |         |                           |       |                    |       | mean                        | sem   | mean  | sem   | mean  | sem   |               |               |       |       |
| <b>Cortisol</b><br>N = 125 | placebo                                       | pre     | 0.35                      | 0.042 | 0.193              | 0.017 | 0.257                       | 0.022 | 0.152 | 0.022 | 0.169 | 0.022 | Treat         | 1.05          | 0.373 |       |
|                            |                                               | post    | 0.343                     | 0.042 | 0.194              | 0.017 | 0.234                       | 0.023 | 0.144 | 0.023 | 0.203 | 0.023 | Treat*prepost | 2.103         | 0.099 |       |
|                            | 430 mg                                        | pre     | 0.283                     | 0.042 | 0.198              | 0.017 | 0.268                       | 0.022 | 0.154 | 0.022 | 0.171 | 0.022 | Treat*pp*ass  | 0.658         | 0.684 |       |
|                            |                                               | post    | 0.301                     | 0.042 | 0.235              | 0.017 | 0.296                       | 0.022 | 0.191 | 0.022 | 0.218 | 0.022 |               |               |       |       |
|                            | 860 mg                                        | pre     | 0.25                      | 0.043 | 0.182              | 0.018 | 0.268                       | 0.023 | 0.119 | 0.023 | 0.158 | 0.023 |               |               |       |       |
|                            |                                               | post    | 0.279                     | 0.043 | 0.178              | 0.018 | 0.217                       | 0.023 | 0.135 | 0.023 | 0.181 | 0.023 |               |               |       |       |
|                            | 1290 mg                                       | pre     | 0.254                     | 0.045 | 0.212              | 0.018 | 0.301                       | 0.024 | 0.16  | 0.024 | 0.177 | 0.024 |               |               |       |       |
|                            |                                               | post    | 0.315                     | 0.045 | 0.203              | 0.018 | 0.291                       | 0.024 | 0.156 | 0.024 | 0.16  | 0.024 |               |               |       |       |
|                            | <b><math>\alpha</math>-amylase</b><br>N = 124 | placebo | pre                       | 184.5 | 25.7               | 173.2 | 19.9                        | 157.2 | 22.8  | 156.7 | 22.9  | 205.7 | 22.8          | Treat         | 0.753 | 0.523 |
|                            |                                               |         | post                      | 225.4 | 26.5               | 178.1 | 20.1                        | 178.6 | 23.3  | 154.7 | 23.3  | 200.9 | 23.3          | Treat*prepost | 1.088 | 0.353 |
|                            |                                               | 430 mg  | pre                       | 171.0 | 26.1               | 187.0 | 20.2                        | 185.5 | 23.1  | 181.3 | 23.1  | 194.3 | 23.1          | Treat*pp*ass  | 0.116 | 0.995 |
|                            |                                               |         | post                      | 208.5 | 26.1               | 177.5 | 20.2                        | 179.0 | 23.1  | 173.0 | 23.1  | 180.6 | 23.3          |               |       |       |
| 860 mg                     |                                               | pre     | 179.2                     | 26.5  | 144.8              | 20.5  | 121.4                       | 23.7  | 148.2 | 23.5  | 164.9 | 23.5  |               |               |       |       |
|                            |                                               | post    | 181.0                     | 26.8  | 148.4              | 20.6  | 140.2                       | 23.7  | 140.2 | 23.7  | 164.7 | 23.7  |               |               |       |       |
| 1290 mg                    |                                               | pre     | 170.7                     | 27.9  | 193.6              | 21.5  | 169.7                       | 24.7  | 195.4 | 24.7  | 215.7 | 24.7  |               |               |       |       |
|                            |                                               | post    | 207.8                     | 27.9  | 172.0              | 21.5  | 166.5                       | 24.7  | 162.3 | 24.7  | 187.2 | 24.7  |               |               |       |       |

1. Kirschbaum, C.; Pirke, K.-M.; Hellhammer, D.H. The 'trier social stress test'—a tool for investigating psychobiological stress responses in a laboratory setting. *Neuropsychobiology* **1993**, *28*, 76-81.
2. Scholey, A.; Haskell, C.; Robertson, B.; Kennedy, D.; Milne, A.; Wetherell, M. Chewing gum alleviates negative mood and reduces cortisol during acute laboratory psychological stress. *Physiology and Behavior* **2009**, *97*, 304-312.
3. Kennedy, D.O.; Little, W.; Haskell, C.F.; Scholey, A.B. Anxiolytic effects of a combination of melissa officinalis and valeriana officinalis during laboratory induced stress. *Phytotherapy Research* **2006**, *20*, 96-102.
4. Kennedy, D.O.; Little, W.; Scholey, A.B. Attenuation of laboratory-induced stress in humans after acute administration of melissa officinalis (lemon balm). *Psychosomatic Medicine* **2004**, *66*, 607-613.
5. Haskell, C.F.; Robertson, B.; Jones, E.; Forster, J.; Jones, R.; Wilde, A.; Maggini, S.; Kennedy, D.O. Effects of a multi-vitamin/mineral supplement on cognitive function and fatigue during extended multi-tasking. *Hum Psychopharmacol* **2010**, *25*, 448-461.
